# Supplementary material for: Pointing and pantomime in wild apes? Female bonobos use referential and iconic gestures to request genito-genital rubbing
Source: PubMed Central journal article supplement (PMC4642555; doi:10.1038/srep13999), 2015-09-11
Supplement: srep13999-s1.pdf [file srep13999-s1.pdf]

1 **Pointing and pantomime in wild apes? Female bonobos use referential and iconic**  
2 **gestures to request genito-genital rubbing**

3

4 Pamela Heidi Douglas & Liza R. Moscovice

5

6

7 **Supplementary Information**

8

9 **Supplementary Table 1**

10

11 **Table 1. Ethogram describing other intentional gestures used by females to**  
12 **solicit GG rubbing interactions.**

13

---

| <b>Gesture</b>  | <b>Description</b>                                                            |
|-----------------|-------------------------------------------------------------------------------|
| Bipedal stand   | Stand bipedally on both legs, facing recipient with an upright posture        |
| Head shake      | Rapidly nod head up and down                                                  |
| Ventral present | Spread legs open to present genital region ventrally while facing a recipient |
| Rock            | Rock torso with a back to front motion                                        |
| Touch           | Gently touch or nudge recipient, usually using a foot                         |

---

14

15

16

17

18

19 **Supplementary Table 2. Comparison of GG rubbing rates per minute, without and**  
20 **with referential or iconic gesturing, while feeding on non-monopolisable foods.**

21

| <b>Signaller</b> | <b>GG rate without<br/>a referential or<br/>iconic gesture</b> | <b>GG rate following<br/>a referential or<br/>iconic gesture</b> |
|------------------|----------------------------------------------------------------|------------------------------------------------------------------|
| Dj               | 0.006                                                          | 0.778                                                            |
| Gw               | 0.002                                                          | 0.719                                                            |
| Ir               | 0.002                                                          | 1.000                                                            |
| Lu               | 0.004                                                          | 1.000                                                            |
| Ma               | 0.003                                                          | 0.964                                                            |
| OI               | 0.002                                                          | 0.571                                                            |
| Po               | 0.004                                                          | 0.571                                                            |
| Su               | 0.005                                                          | 1.000                                                            |
| Wi               | 0.004                                                          | 1.000                                                            |
| Zo               | 0.003                                                          | 1.000                                                            |

22

23

24

25

26

27 **Supplementary Table 3. Results of a GLMM comparing the likelihood of co-**  
28 **feeding following successful or unsuccessful gestural solicitations.**

29 Significant predictors are indicated in bold typeface.

30

| <b>Response Variable</b>              | <b>Estimate</b> | <b>SE</b>     | <b><i>P</i> value</b> |
|---------------------------------------|-----------------|---------------|-----------------------|
| Co-feed following gesture<br>(yes/no) |                 |               |                       |
| Intercept                             | -0.6286         | 0.4378        |                       |
| <b>Gesture leads to GG rubbing</b>    | <b>1.3072</b>   | <b>0.4889</b> | <b>0.0075</b>         |

31

32

33

34 **Supplementary Figure Legend**

35

36 **Supplementary Figure 1. Description of elements within gesture bouts.**

37 The relative amount and position of different gesture types within gesture bouts,  
38 including foot-pointing, hip shimmies, and other intentional gestures. Shading indicates  
39 different gesture types. Intentional gestures include bipedal stand, head shake, ventral  
40 present and rock. Numbers over the bars indicate the total number of gesture bouts of  
41 each length (shown on the x-axis).

42

43

44

45

46

47

48

49

50

51

52

53

54

55

56

57 **Supplementary Figure 1**

58

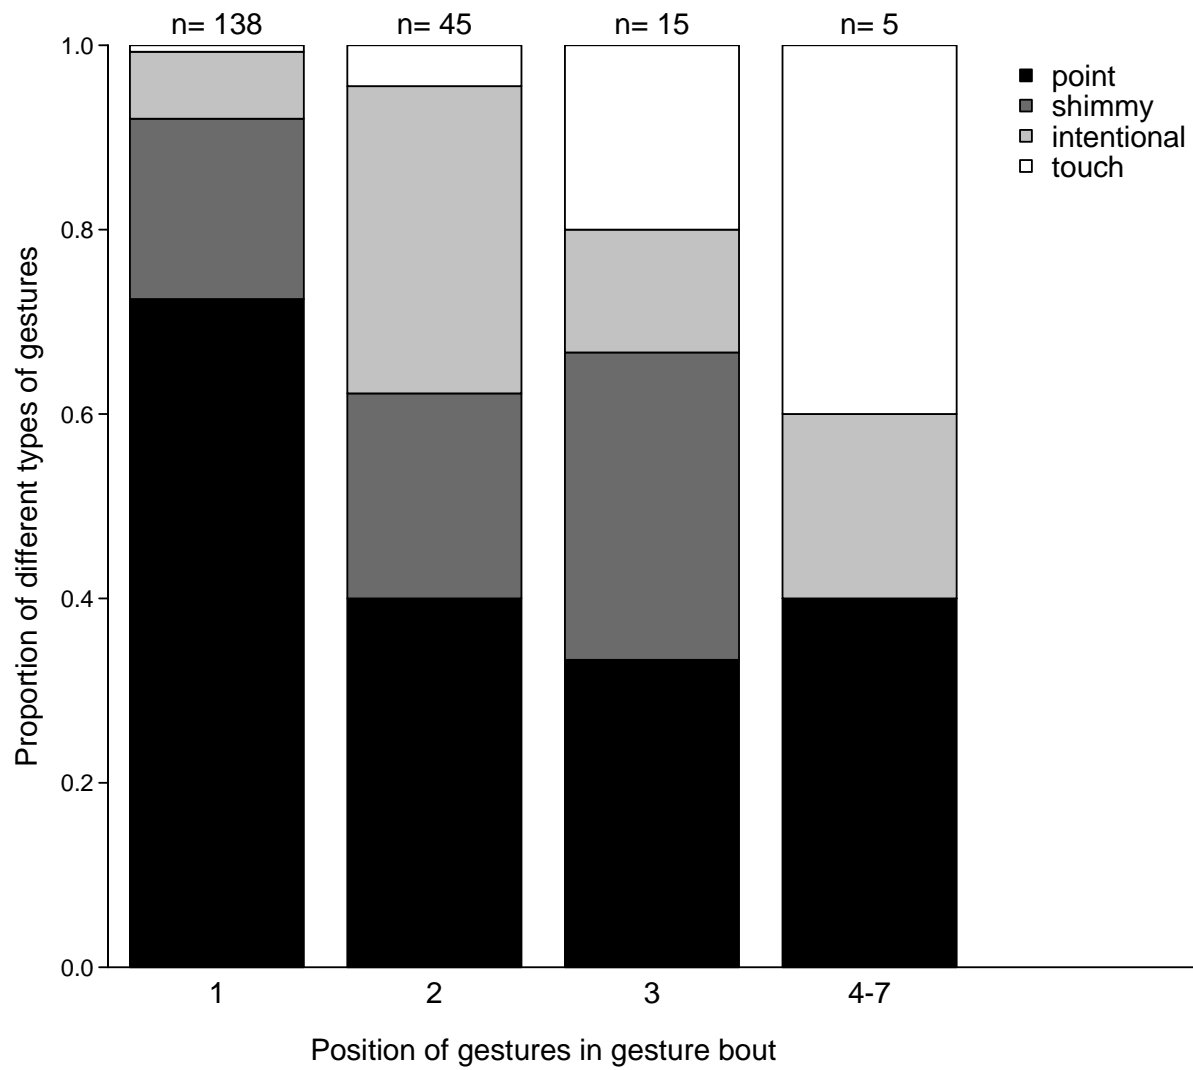

59

60

61

62

63

64

65

66

67

68

69 **Supplementary Movies**

70

71 **Supplementary Movie 1. Example of foot-pointing gesture.**

72 At 00:02, Dj is initiating a solicitation to Na who is feeding. A yellow circle surrounds Dj's  
73 right foot during her pointing gesture, and the footage has been slowed down during the  
74 pointing to assist in detecting the gesture. The females then engage in prolonged GG  
75 rubbing. Afterwards, the females co-feed.

76

77

78 **Supplementary Movie 2. Example of hip shimmy gesture.**

79 At 00:00, Ma is soliciting to Ri who is feeding (initially outside the frame). A yellow circle  
80 surrounds Ma's hips and sexual swelling during her hip shimmy. Ma moves closer to Ri,  
81 and then shows persistence in gesturing again with a ventral present and second hip  
82 shimmy at 00:19 (partly obstructed by foliage). The females then engage in a GG  
83 rubbing.

84

85
